# Supplementary material for: Knowledge, Competencies, and Skills for a Sustainable Sport Management Growth: A Systematic Review
Source: MDPI journal article supplement (doi:10.3390/su15097061), 2023-04-23
Supplement: s1 [file s1]

**Supplementary material S3 - Mixed Methods Appraisal Tool (MMAT) checklist items [39].**

|                                               | <b>Methodological quality criteria</b>                                                                                                                                                                                                                                                                                                                                                                                                                                                                                                                                                                 |
|-----------------------------------------------|--------------------------------------------------------------------------------------------------------------------------------------------------------------------------------------------------------------------------------------------------------------------------------------------------------------------------------------------------------------------------------------------------------------------------------------------------------------------------------------------------------------------------------------------------------------------------------------------------------|
| <b>1. Screening questions (for all types)</b> | <p><b>1.1.</b> Are there clear research questions?</p> <p><b>1.2</b> Do the collected data allow to address the research questions?</p>                                                                                                                                                                                                                                                                                                                                                                                                                                                                |
| <b>2. Qualitative studies</b>                 | <p><b>2.1.</b> Is the qualitative approach appropriate to answer the research question?</p> <p><b>2.2.</b> Are the qualitative data collection methods adequate to address the research question?</p> <p><b>2.3.</b> Are the findings adequately derived from the data?</p> <p><b>2.4.</b> Is the interpretation of results sufficiently substantiated by data?</p> <p><b>2.5.</b> Is there coherence between qualitative data sources, collection, analysis and interpretation?</p>                                                                                                                   |
| <b>3. Quantitative descriptive studies</b>    | <p><b>3.1.</b> Is the sampling strategy relevant to address the research question?</p> <p><b>3.2.</b> Is the sample representative of the target population?</p> <p><b>3.3.</b> Are the measurements appropriate?</p> <p><b>3.4.</b> Is the risk of nonresponse bias low?</p> <p><b>3.5.</b> Is the statistical analysis appropriate to answer the research question?</p>                                                                                                                                                                                                                              |
| <b>4. Mixed method studies</b>                | <p><b>4.1.</b> Is there an adequate rationale for using a mixed methods design to address the research question?</p> <p><b>4.2.</b> Are the different components of the study effectively integrated to answer the research question?</p> <p><b>4.3.</b> Are the results adequately brought together into overall interpretations?</p> <p><b>4.4.</b> Are divergences and inconsistencies between quantitative and qualitative results adequately addressed?</p> <p><b>4.5.</b> Do the different components of the study adhere to the quality criteria of each tradition of the methods involved?</p> |

## Quality evaluation of the included studies

| Code | Methodology  | Transversal questions |            | Specific questions based on the study design |            |            |            |            | Score |
|------|--------------|-----------------------|------------|----------------------------------------------|------------|------------|------------|------------|-------|
|      |              | Question 1            | Question 2 | Question 3                                   | Question 4 | Question 5 | Question 6 | Question 7 |       |
| 40   | Qualitative  | Yes                   | Yes        | Yes                                          | Yes        | Yes        | Yes        | Yes        | 7     |
| 41   | Quantitative | Yes                   | Yes        | Yes                                          | Yes        | Yes        | Yes        | Yes        | 7     |
| 42   | Qualitative  | Yes                   | Yes        | Yes                                          | Yes        | Yes        | Yes        | Yes        | 7     |
| 25   | Mixed        | Yes                   | Yes        | Yes                                          | Yes        | Yes        | Yes        | Yes        | 7     |
| 43   | Quantitative | Yes                   | Yes        | Yes                                          | Yes        | Yes        | CT         | Yes        | 6     |
| 44   | Qualitative  | Yes                   | Yes        | Yes                                          | Yes        | Yes        | Yes        | CT         | 6     |
| 45   | Quantitative | Yes                   | Yes        | Yes                                          | CT         | CT         | CT         | Yes        | 4     |
| 46   | Mixed        | Yes                   | Yes        | Yes                                          | Yes        | CT         | CT         | CT         | 4     |
| 47   | Quantitative | Yes                   | Yes        | Yes                                          | Yes        | CT         | CT         | CT         | 4     |
| 48   | Qualitative  | Yes                   | Yes        | Yes                                          | Yes        | Yes        | Yes        | Yes        | 7     |
| 49   | Qualitative  | Yes                   | Yes        | Yes                                          | Yes        | Yes        | Yes        | CT         | 6     |
| 50   | Mixed        | Yes                   | Yes        | Yes                                          | Yes        | Yes        | CT         | CT         | 5     |
| 51   | Quantitative | Yes                   | Yes        | CT                                           | CT         | Yes        | CT         | Yes        | 4     |
| 52   | Quantitative | Yes                   | Yes        | Yes                                          | Yes        | Yes        | Yes        | Yes        | 7     |
| 53   | Quantitative | Yes                   | Yes        | Yes                                          | CT         | CT         | CT         | Yes        | 4     |
| 54   | Mixed        | Yes                   | Yes        | Yes                                          | Yes        | CT         | CT         | CT         | 4     |
| 55   | Qualitative  | Yes                   | Yes        | Yes                                          | Yes        | CT         | CT         | CT         | 4     |
| 56   | Qualitative  | Yes                   | Yes        | Yes                                          | Yes        | Yes        | CT         | CT         | 5     |
| 57   | Qualitative  | Yes                   | Yes        | Yes                                          | Yes        | Yes        | Yes        | Yes        | 7     |
| 58   | Quantitative | Yes                   | Yes        | Yes                                          | Yes        | Yes        | CT         | CT         | 5     |
| 59   | Quantitative | Yes                   | Yes        | CT                                           | Yes        | Yes        | CT         | Yes        | 5     |
| 60   | Qualitative  | Yes                   | Yes        | Yes                                          | Yes        | Yes        | Yes        | CT         | 6     |
| 61   | Qualitative  | Yes                   | Yes        | Yes                                          | Yes        | CT         | CT         | Yes        | 5     |
| 62   | Mixed        | Yes                   | Yes        | Yes                                          | Yes        | Yes        | Yes        | Yes        | 7     |
| 63   | Qualitative  | Yes                   | Yes        | Yes                                          | Yes        | CT         | CT         | CT         | 4     |
| 64   | Qualitative  | Yes                   | Yes        | Yes                                          | Yes        | Yes        | Yes        | Yes        | 7     |
| 23   | Quantitative | Yes                   | Yes        | Yes                                          | Yes        | Yes        | Yes        | Yes        | 7     |
| 65   | Quantitative | Yes                   | Yes        | Yes                                          | Yes        | Yes        | Yes        | Yes        | 7     |
| 66   | Qualitative  | Yes                   | Yes        | Yes                                          | Yes        | Yes        | Yes        | Yes        | 7     |
| 67   | Qualitative  | Yes                   | Yes        | Yes                                          | Yes        | Yes        | Yes        | Yes        | 7     |
| 13   | Mixed        | Yes                   | Yes        | Yes                                          | Yes        | Yes        | Yes        | Yes        | 7     |
| 68   | Qualitative  | Yes                   | Yes        | Yes                                          | Yes        | Yes        | Yes        | Yes        | 7     |
| 69   | Mixed        | Yes                   | Yes        | Yes                                          | Yes        | Yes        | Yes        | Yes        | 7     |
| 70   | Qualitative  | Yes                   | CT         | Yes                                          | Yes        | Yes        | CT         | CT         | 4     |
| 71   | Qualitative  | Yes                   | Yes        | Yes                                          | Yes        | Yes        | Yes        | Yes        | 7     |
| 12   | Quantitative | Yes                   | Yes        | Yes                                          | Yes        | Yes        | Yes        | Yes        | 7     |
| 72   | Quantitative | Yes                   | Yes        | CT                                           | CT         | Yes        | CT         | Yes        | 4     |
| 73   | Quantitative | Yes                   | Yes        | CT                                           | CT         | Yes        | CT         | Yes        | 4     |
| 74   | Qualitative  | Yes                   | Yes        | Yes                                          | Yes        | Yes        | Yes        | Yes        | 7     |
| 75   | Quantitative | Yes                   | Yes        | CT                                           | CT         | Yes        | CT         | Yes        | 4     |
| 76   | Mixed        | Yes                   | Yes        | Yes                                          | Yes        | Yes        | CT         | CT         | 5     |
| 77   | Quantitative | Yes                   | Yes        | Yes                                          | Yes        | Yes        | Yes        | Yes        | 7     |
| 22   | Quantitative | Yes                   | Yes        | Yes                                          | Yes        | Yes        | CT         | CT         | 5     |
| 78   | Quantitative | Yes                   | Yes        | Yes                                          | Yes        | Yes        | Yes        | Yes        | 7     |
| 79   | Qualitative  | Yes                   | CT         | Yes                                          | CT         | Yes        | Yes        | CT         | 4     |
| 80   | Mixed        | Yes                   | Yes        | Yes                                          | Yes        | Yes        | Yes        | Yes        | 7     |
| 81   | Qualitative  | Yes                   | Yes        | Yes                                          | CT         | Yes        | CT         | Yes        | 5     |
| 82   | Quantitative | Yes                   | Yes        | Yes                                          | CT         | Yes        | CT         | Yes        | 5     |
