# Supplementary material for: Knowledge, Competencies, and Skills for a Sustainable Sport Management Growth: A Systematic Review
Source: MDPI journal article supplement (doi:10.3390/su15097061), 2023-04-23
Supplement: s1 [file s1]

Archive with 4 entries (4 files):
- Supplementary File S1-Data extracted from the ESCO platform.pdf
- Supplementary File S2-Data extraction regarding relevant KCS mentioned in the included studies, and assigned cluster.pdf
- Supplementary File S3-Mixed Methods Appraisal Tool (MMAT) checklist items.pdf
- Supplementary File S4-PRISMA 2020 checklist.pdf
