# Supplementary material for: Knowledge, Competencies, and Skills for a Sustainable Sport Management Growth: A Systematic Review
Source: MDPI journal article supplement (doi:10.3390/su15097061), 2023-04-23
Supplement: s1 [file s1 › Supplementary File S1-Data extracted from the ESCO platform.pdf]

## sport administrator

Managers

Production and specialised services managers

Professional services managers

Professional services managers not elsewhere classified

sport administrator

Description

### Code

1349.22

### Description

Sport administrators act in a middle management role within sport organisations at all levels, in any sport or country in Europe (e.g. sport clubs, federations, and local authorities). They carry out organisational tasks across a wide range of functions in accordance with the strategy and policies set by management, boards of directors and committees. They play a crucial role in the overall delivery of sport and their work in sport organisations directly impact the unlocking of the potential of the sector in Europe towards health, social inclusion and economy.

### Alternative Labels

administrator of olympic spot recruiting

administrator of sports club

cricket club administrator

programme administrator

sport administration officer

sport administrator

sports administration officer

sports club administrator

### Regulatory Aspect

To see if and how this occupation is regulated in EU Member States, EEA countries or Switzerland please consult the Regulated Professions Database of the Commission. Regulated Professions Database:

[http://ec.europa.eu/growth/single-market/services/free-movement-professionals/qualifications-recognition\\_en](http://ec.europa.eu/growth/single-market/services/free-movement-professionals/qualifications-recognition_en)

Skills & Competences

### Essential Skills and Competences

|                                                        |                                                   |
|--------------------------------------------------------|---------------------------------------------------|
| coordinate the administration of a sports organisation | develop opportunities for                         |
| progression in sport                                   | develop practices to conduct effective sport club |
| management                                             | ensure health and safety of customers             |
|                                                        | ensure health and safety of                       |

|                            |                                                         |                                    |          |
|----------------------------|---------------------------------------------------------|------------------------------------|----------|
| staff                      | ensure the provision of resources for physical activity | implement                          |          |
| operational business plans | implement strategic planning                            | involve                            |          |
| volunteers                 | lead a team                                             | liaise with sports organisations   | manage a |
| team                       | manage customer service                                 | manage internal process of a sport |          |
| organisation               | manage personal professional development in sport       | manage sport                       |          |
| facility finances          | perform project management                              | promote equality in sport          |          |
| activities                 | respond to enquiries                                    |                                    |          |

## Essential Knowledge

impact of politics on sport delivery

## Optional Skills and Competences

|                                                  |                                           |                           |                                   |                                     |  |
|--------------------------------------------------|-------------------------------------------|---------------------------|-----------------------------------|-------------------------------------|--|
| apply for external funding for physical activity |                                           |                           | contribute to the safeguarding of |                                     |  |
| children                                         | establish collaborative relations         |                           |                                   | facilitate physical activity in the |  |
| community                                        |                                           | liaise with board members |                                   | manage athletes touring             |  |
| abroad                                           | manage sport competition programmes       |                           |                                   | manage sports                       |  |
| events                                           | promote sport activities in public health |                           |                                   | support sport activities in         |  |
| education                                        |                                           |                           |                                   |                                     |  |

## Optional Knowledge

CA Datacom/DB

**Concept URI**

**Concept Uri**

<http://data.europa.eu/esco/occupation/20e39113-05f5-4184-94e2-f5e8e8c8d2ea>

# sport facility manager

## Managers

Hospitality, retail and other services managers

Other services managers

Sports, recreation and cultural centre managers

sport facility manager

## Description

### Code

1431.3

## Description

Sport facility managers lead and manage a sport facility or venue, including its operations, programming, sales, promotion, health and safety, development, and staffing. They ensure it provides excellent customer service whilst achieving business, financial and operational targets.

## Alternative Labels

director

fitness club manager

sport facility manager

sport hall manager

sport venue manager

stadium manager

swimming pool manager

## Regulatory Aspect

To see if and how this occupation is regulated in EU Member States, EEA countries or Switzerland please consult the Regulated Professions Database of the Commission. Regulated Professions Database:

[http://ec.europa.eu/growth/single-market/services/free-movement-professionals/qualifications-recognition\\_en](http://ec.europa.eu/growth/single-market/services/free-movement-professionals/qualifications-recognition_en)

## Skills & Competences

### Essential Skills and Competences

|                            |                                       |                              |                   |  |
|----------------------------|---------------------------------------|------------------------------|-------------------|--|
| coordinate events          | ensure health and safety of customers |                              | ensure health and |  |
| safety of staff            | handle customer complaints            | handle incidents             | implement         |  |
| operational business plans |                                       | implement strategic planning | involve           |  |

|                                            |                                           |               |                           |         |
|--------------------------------------------|-------------------------------------------|---------------|---------------------------|---------|
| volunteers                                 | lead a team                               | manage a team | manage customer service   | manage  |
| personal professional development in sport |                                           |               | manage physical resources | manage  |
| sport facility finances                    | organise facility activities              |               | perform project           |         |
| management                                 | promote equality in sport activities      |               | provide first aid         | recruit |
| employees                                  | supervise maintenance of sport facilities |               |                           |         |

## Optional Skills and Competences

|                           |                                               |                                   |                                       |  |
|---------------------------|-----------------------------------------------|-----------------------------------|---------------------------------------|--|
| apply conflict management |                                               | contribute to the safeguarding of |                                       |  |
| children                  | cooperate with colleagues                     | coordinate marketing plan         |                                       |  |
| actions                   | facilitate physical activity in the community |                                   | promote sport activities in           |  |
| public health             | sell products                                 | sell services                     | support sport activities in education |  |

**Concept URI**

**Concept Uri**

<http://data.europa.eu/esco/occupation/825ab049-2f0c-4acf-b402-9c6bb51acca2>

# recreation policy officer

Professionals

Business and administration professionals

Administration professionals

Policy administration professionals

policy officer

recreation policy officer

Description

## Code

2422.12.13

## Description

Recreation policy officers research, analyse and develop policies in the sports and recreation sector and implement these policies in order to improve the sport and recreation system and improve the health of the population. They strive to increase the participation in sports, support athletes, enhance the performance of athletes in national and international competitions, improve social inclusion and community development. They work closely with partners, external organisations or other stakeholders and provide them with regular updates.

## Alternative Labels

recreation policy advisor

recreation policy officer

recreation policy specialist

sport and recreation policy officer

sports and recreation policy advisor

sports and recreation policy analyst

sports and recreation policy officer

sports and recreation policy researcher

sports and recreation policy specialist

sports policy advisor

sports policy officer

## Regulatory Aspect

To see if and how this occupation is regulated in EU Member States, EEA countries or Switzerland please consult the Regulated Professions Database of the Commission. Regulated Professions Database:

[http://ec.europa.eu/growth/single-market/services/free-movement-professionals/qualifications-recognition\\_en](http://ec.europa.eu/growth/single-market/services/free-movement-professionals/qualifications-recognition_en)

## Skills & Competences

### Essential Skills and Competences

|                            |                                                 |                     |
|----------------------------|-------------------------------------------------|---------------------|
| advise on legislative acts | analyse community needs                         | create solutions to |
| problems                   | develop recreation programmes                   | develop sports      |
| programmes                 | maintain relationships with government agencies | manage              |

|                                  |                               |               |
|----------------------------------|-------------------------------|---------------|
| government policy implementation | promote recreation activities | promote sport |
| activities in public health      |                               |               |

## Optional Skills and Competences

|                                        |                              |                            |             |
|----------------------------------------|------------------------------|----------------------------|-------------|
| advise on government policy compliance |                              | apply latest sport science |             |
| findings                               | develop professional network | liaise with politicians    | liaise with |
| sports organisations                   | perform project management   |                            |             |

## Optional Knowledge

|                                                      |                                 |  |                   |         |
|------------------------------------------------------|---------------------------------|--|-------------------|---------|
| European Structural and Investment Funds regulations |                                 |  | government policy |         |
| implementation                                       | government representation       |  | policy analysis   | project |
| management                                           | scientific research methodology |  |                   |         |

**Concept URI**

**Concept Uri**

<http://data.europa.eu/esco/occupation/fdf7b000-d923-4086-9660-eb8ee5e77ef0>

# recreation policy officer

Professionals

Business and administration professionals

Administration professionals

Policy administration professionals

policy officer

recreation policy officer

Description

## Code

2422.12.13

## Description

Recreation policy officers research, analyse and develop policies in the sports and recreation sector and implement these policies in order to improve the sport and recreation system and improve the health of the population. They strive to increase the participation in sports, support athletes, enhance the performance of athletes in national and international competitions, improve social inclusion and community development. They work closely with partners, external organisations or other stakeholders and provide them with regular updates.

## Alternative Labels

recreation policy advisor

recreation policy officer

recreation policy specialist

sport and recreation policy officer

sports and recreation policy advisor

sports and recreation policy analyst

sports and recreation policy officer

sports and recreation policy researcher

sports and recreation policy specialist

sports policy advisor

sports policy officer

## Regulatory Aspect

To see if and how this occupation is regulated in EU Member States, EEA countries or Switzerland please consult the Regulated Professions Database of the Commission. Regulated Professions Database:

[http://ec.europa.eu/growth/single-market/services/free-movement-professionals/qualifications-recognition\\_en](http://ec.europa.eu/growth/single-market/services/free-movement-professionals/qualifications-recognition_en)

## Skills & Competences

### Essential Skills and Competences

|                            |                                                 |                     |
|----------------------------|-------------------------------------------------|---------------------|
| advise on legislative acts | analyse community needs                         | create solutions to |
| problems                   | develop recreation programmes                   | develop sports      |
| programmes                 | maintain relationships with government agencies | manage              |

|                                  |                               |               |
|----------------------------------|-------------------------------|---------------|
| government policy implementation | promote recreation activities | promote sport |
| activities in public health      |                               |               |

## Optional Skills and Competences

|                                        |                              |                            |             |
|----------------------------------------|------------------------------|----------------------------|-------------|
| advise on government policy compliance |                              | apply latest sport science |             |
| findings                               | develop professional network | liaise with politicians    | liaise with |
| sports organisations                   | perform project management   |                            |             |

## Optional Knowledge

|                                                      |                                 |  |                   |         |
|------------------------------------------------------|---------------------------------|--|-------------------|---------|
| European Structural and Investment Funds regulations |                                 |  | government policy |         |
| implementation                                       | government representation       |  | policy analysis   | project |
| management                                           | scientific research methodology |  |                   |         |

**Concept URI**

**Concept Uri**

<http://data.europa.eu/esco/occupation/fdf7b000-d923-4086-9660-eb8ee5e77ef0>

# sports programme coordinator

Professionals

Business and administration professionals

Administration professionals

Policy administration professionals

sports programme coordinator

Description

Code

2422.17

## Description

Sports programme coordinators coordinate sports and recreation activities and policy implementation. They develop new programs and aim to promote and implement them, as well as ensure the maintenance of sports and recreation facilities.

## Alternative Labels

community development officer

recreation officer

recreation programme coordinator

sports development coordinator

sports development officer

sports program coordinator

## Regulatory Aspect

To see if and how this occupation is regulated in EU Member States, EEA countries or Switzerland please consult the Regulated Professions Database of the Commission. Regulated Professions Database:

[http://ec.europa.eu/growth/single-market/services/free-movement-professionals/qualifications-recognition\\_en](http://ec.europa.eu/growth/single-market/services/free-movement-professionals/qualifications-recognition_en)

## Skills & Competences

### Essential Skills and Competences

|                       |                                   |                            |      |
|-----------------------|-----------------------------------|----------------------------|------|
| analyse goal progress | develop recreation programmes     | develop sports             |      |
| programmes            | establish collaborative relations | liaise with local          |      |
| authorities           | liaise with sports organisations  | perform project management | plan |
| allocation of space   | promote recreation activities     | promote sports in          |      |
| schools               | promote sports organisation       |                            |      |

## Essential Knowledge

|                                  |                               |
|----------------------------------|-------------------------------|
| government policy implementation | health, safety and hygiene    |
| legislation                      | project management principles |

## Optional Skills and Competences

|                         |                                               |                             |                      |
|-------------------------|-----------------------------------------------|-----------------------------|----------------------|
| analyse community needs | apply strategic thinking                      | build community             |                      |
| relations               | communicate with media                        | coordinate events           | develop professional |
| network                 | ensure equipment availability                 | fix meetings                | keep task            |
| records                 | maintain relations with local representatives |                             | manage               |
| budgets                 | manage staff                                  | perform market research     | propose leisure      |
| activities              | schedule recreation facilities                | set organisational policies | supervise            |
| site maintenance        |                                               |                             |                      |

## Optional Knowledge

|                      |
|----------------------|
| budgetary principles |
|----------------------|

**Concept URI**

**Concept Uri**

<http://data.europa.eu/esco/occupation/7b629a14-09d0-417e-8181-7683923b4e5e>
