# Supplementary material for: Knowledge, Competencies, and Skills for a Sustainable Sport Management Growth: A Systematic Review
Source: MDPI journal article supplement (doi:10.3390/su15097061), 2023-04-23
Supplement: s1 [file s1 › Supplementary File S2-Data extraction regarding relevant KCS mentioned in the included studies, and assigned cluster.pdf]

**Supplementary material S2 – Data extraction regarding relevant K/C/S mentioned in the included studies, and assigned cluster.**

|         |                            |    | Codes of the included studies |    |    |    |    |    |    |    |    |    |    |    |    |    |    |    |    |    |    |    |    |    |    |    |    |    |    |    |    |    |    |    |    |    |    |    |    |    |    |    |    |    |    |    |    |    |    |    |  |  |  |  |  |  |  |  |  |  |  |  |  |  |  |  |  |  |  |  |  |  |  |  |  |  |  |  |  |  |  |  |
|---------|----------------------------|----|-------------------------------|----|----|----|----|----|----|----|----|----|----|----|----|----|----|----|----|----|----|----|----|----|----|----|----|----|----|----|----|----|----|----|----|----|----|----|----|----|----|----|----|----|----|----|----|----|----|----|--|--|--|--|--|--|--|--|--|--|--|--|--|--|--|--|--|--|--|--|--|--|--|--|--|--|--|--|--|--|--|--|
| Cluster | Item                       | N  | 40                            | 41 | 42 | 25 | 43 | 44 | 45 | 46 | 47 | 48 | 49 | 50 | 51 | 52 | 53 | 54 | 55 | 56 | 57 | 58 | 59 | 60 | 61 | 62 | 63 | 64 | 23 | 65 | 66 | 67 | 13 | 68 | 69 | 70 | 71 | 12 | 72 | 73 | 74 | 75 | 76 | 77 | 22 | 78 | 79 | 80 | 81 | 82 |  |  |  |  |  |  |  |  |  |  |  |  |  |  |  |  |  |  |  |  |  |  |  |  |  |  |  |  |  |  |  |  |
| BK      | Event management           | 11 | x                             |    |    |    |    | x  | x  |    |    |    |    |    |    |    | X  |    |    |    |    |    |    |    |    |    |    |    |    |    | X  | X  |    | X  |    |    |    | X  |    |    |    | X  |    |    | X  |    |    |    |    |    |  |  |  |  |  |  |  |  |  |  |  |  |  |  |  |  |  |  |  |  |  |  |  |  |  |  |  |  |  |  |  |  |
| BK      | Finance and administration | 20 | x                             |    | x  | x  |    | x  | x  | x  |    |    |    | x  | x  | x  | x  | x  | x  |    |    |    |    |    |    | X  |    |    | X  | X  |    |    |    |    | X  | X  |    | X  |    |    |    |    | X  |    |    | X  |    |    |    |    |  |  |  |  |  |  |  |  |  |  |  |  |  |  |  |  |  |  |  |  |  |  |  |  |  |  |  |  |  |  |  |  |
| BK      | Human resources            | 12 | x                             |    | x  |    |    |    | x  | x  |    |    |    | x  | x  |    | x  |    | x  |    |    |    |    |    |    | X  |    |    |    |    |    |    |    | X  |    |    |    | X  |    |    |    |    | X  |    |    |    |    |    |    |    |  |  |  |  |  |  |  |  |  |  |  |  |  |  |  |  |  |  |  |  |  |  |  |  |  |  |  |  |  |  |  |  |
| BK      | Legal and sport policy     | 10 |                               |    |    |    |    |    | x  |    |    |    |    | x  | x  |    | x  | x  |    |    |    |    |    |    |    | X  |    |    | X  |    | X  |    |    |    |    | X  |    |    |    |    |    |    | X  | </ |    |    |    |    |    |    |  |  |  |  |  |  |  |  |  |  |  |  |  |  |  |  |  |  |  |  |  |  |  |  |  |  |  |  |  |  |  |  |

[illegible]

Note: BK= Background knowledge; C= Competence; GE= General experience; HS= Hard skills; PT/A= Personal traits/attributes; SS= Soft skills. Other attributes= citations not included within a major cluster due to low frequency of occurrence.
